# Supplementary material for: Polypyrrole nanotubes for electrochemically controlled solid-phase extraction of anions and cations
Source: Royal Society of Chemistry journal article supplement (doi:10.1039/c3ay41477a), 2013-01-01
Supplement: c3ay41477a.pdf [file c3ay41477a.pdf]

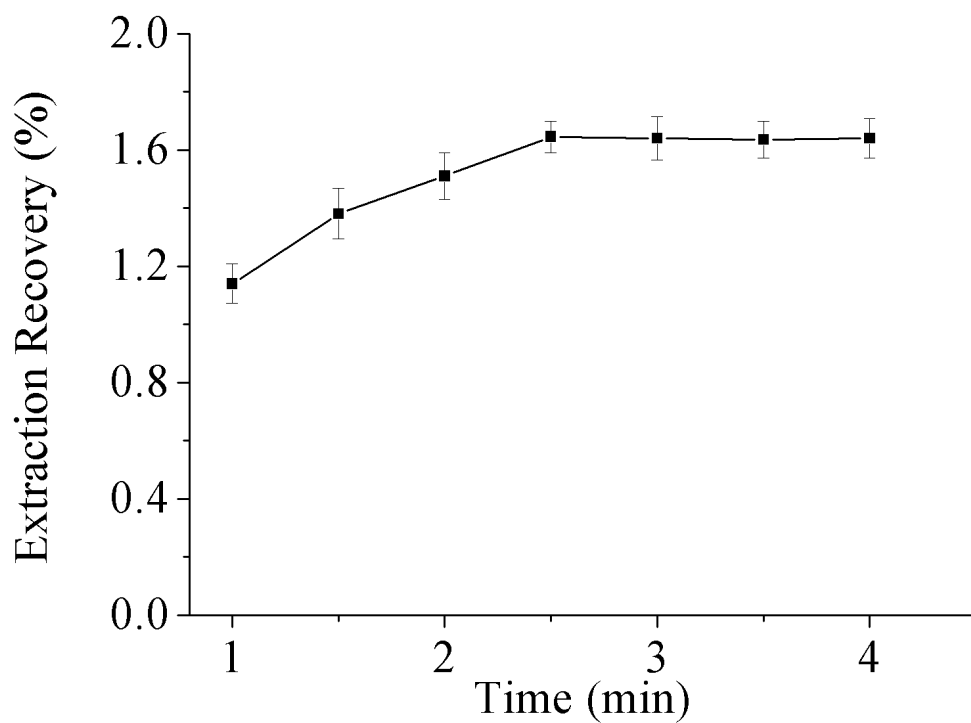

**Fig. S1** Desorption time optimization of dopamine. Conditions: 15 min extraction at room temperature, desorbed in 0.01 M NaCl solution.
